# Supplementary figures and images for: Golimumab in combination with methotrexate in Japanese patients with active rheumatoid arthritis: results of the GO-FORTH study
Source: HighWire-hosted journal article supplement (doi:10.1136/ard.2011.200317), 2011-11-26

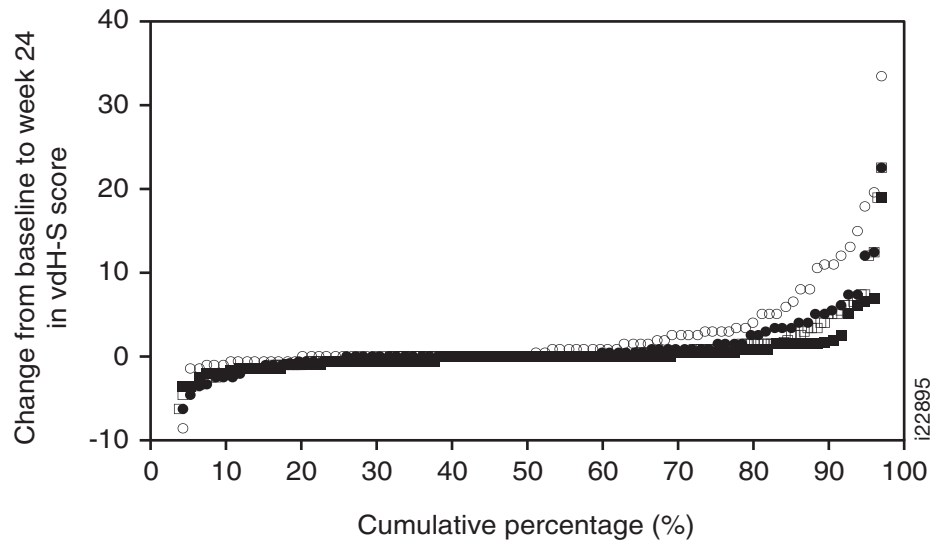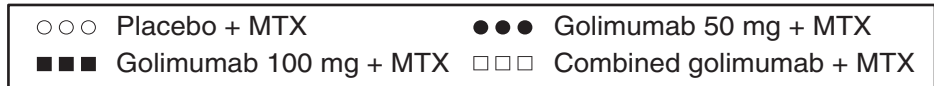

i22895

Supplement: ard.2011.200317_ds1.pdf [file ard.2011.200317_ds1.pdf]
